# Supplementary material for: Immune landscapes associated with different glioblastoma molecular subtypes
Source: Springer Nature journal article supplement (doi:10.1186/s40478-019-0803-6), 2019-11-29
Supplement: 40478_2019_803_MOESM1_ESM.pdf [file 40478_2019_803_MOESM1_ESM.pdf]

## Supplementary Materials

### Supplementary Figure S1. GBM tumors contain few B cells.

The panel above shows representative images (B-E; B'-E') from GBM stained for CD20 (in brown). Among all our cohort, CD20 positive B cells were only found in four cases. On the left, samples of Tonsil are used as controls (A, A').

# CD20

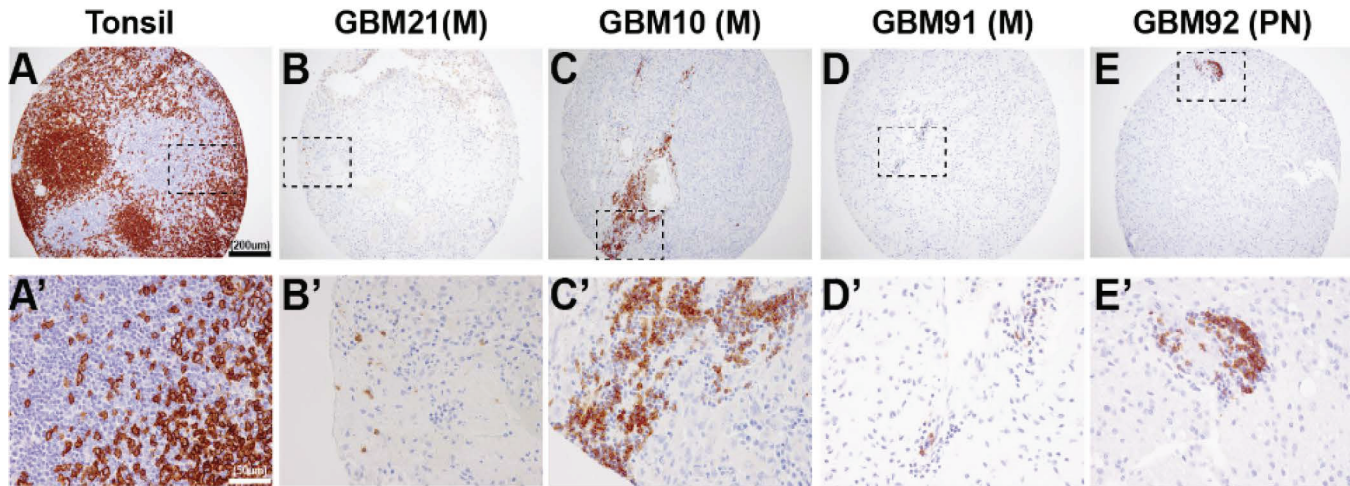

Supplementary Figure S1

**Supplementary Table S1. Clinical data and patient classification.**

| TMA number | Subtype | Survival in months | IDH1 R132H      |
|------------|---------|--------------------|-----------------|
| TMA1GBM1   | PN      | 7                  |                 |
| TMA1GBM2   | M       | 4                  |                 |
| TMA1GBM3   | PN      | >120               | <b>POSITIVE</b> |
| TMA1GBM4   | M       | 11                 |                 |
| TMA1GBM5   | CL      | 11                 |                 |
| TMA1GBM6   | M       | 4                  |                 |
| TMA1GBM7   | CL      | 12                 |                 |
| TMA1GBM8   | M       | 8                  |                 |
| TMA1GBM9   | PN      | 4                  |                 |
| TMA1GBM10  | M       | 12                 |                 |
| TMA1GBM11  | CL      | 13                 |                 |
| TMA1GBM12  | M       | 1                  |                 |
| TMA1GBM13  | CL      | 20                 |                 |
| TMA1GBM14  | N       | >120               |                 |
| TMA1GBM15  | N       | 4                  |                 |
| TMA1GBM16  | CL      | 3                  |                 |
| TMA1GBM17  | CL      | 1                  |                 |
| TMA1GBM18  | PN      | 7                  |                 |
| TMA1GBM19  | M       | 28                 |                 |
| TMA1GBM20  | CL      | 11                 |                 |
| TMA1GBM21  | M       | 5                  |                 |
| TMA1GBM22  | N       | 16                 |                 |
| TMA1GBM23  | N       | 15                 |                 |
| TMA1GBM24  | CL      | 22                 |                 |
| TMA1GBM25  | CL      | 11                 |                 |
| TMA1GBM26  | M       | 13                 |                 |
| TMA1GBM27  | CL      | 28                 |                 |
| TMA1GBM28  | N       | >100               | <b>POSITIVE</b> |
| TMA1GBM29  | PN      | 4                  |                 |
| TMA1GBM30  | N       | 24                 |                 |
| TMA1GBM31  | N       | 74                 |                 |
| TMA1GBM32  | CL      | 10                 |                 |
| TMA1GBM33  | N       | 21                 |                 |
| TMA1GBM34  | M       | 11                 |                 |
| TMA1GBM35  | PN      | 6                  |                 |
| TMA1GBM36  | PN      | 17                 |                 |
| TMA1GBM37  | N       | 16                 |                 |
| TMA1GBM38  | PN      | >88                |                 |
| TMA1GBM39  | N       | 7                  |                 |
| TMA1GBM40  | PN      | >77                |                 |
| TMA1GBM41  | CL      | 16                 |                 |
| TMA1GBM42  | CL      | 19                 |                 |
| TMA1GBM43  | PN      | 12                 |                 |
| TMA1GBM44  | N       | 15                 |                 |
| TMA1GBM45  | PN      | 23                 |                 |
| TMA1GBM46  | CL      | 12                 |                 |
| TMA1GBM47  | CL      | 20                 |                 |
| TMA1GBM48  | M       | 4                  |                 |
| TMA1GBM49  | PN      | >88                |                 |
| TMA1GBM50  | PN      | 0                  |                 |
| TMA1GBM51  | M       | 6                  |                 |
| TMA1GBM52  | PN      | 2                  |                 |

**Supplementary Table S1. Clinical data and patient classification.**

| TMA number | Subtype | Survival in months | IDH1 R132H |
|------------|---------|--------------------|------------|
| TMA1GBM53  | M       | 4                  |            |
| TMA1GBM54  | PN      | 2                  |            |
| TMA1GBM55  | N       | 45                 |            |
| TMA1GBM56  | CL      | 13                 |            |
| TMA2GBM57  | M       | 19                 |            |
| TMA2GBM58  | M       | 12                 |            |
| TMA2GBM59  | PN      | >70                |            |
| TMA2GBM60  | N       | 3                  |            |
| TMA2GBM61  | N       | 8                  |            |
| TMA2GBM62  | N       | 12                 |            |
| TMA2GBM63  | CL      | 15                 |            |
| TMA2GBM64  | PN      | 4                  |            |
| TMA2GBM65  | N       | >43                |            |
| TMA2GBM66  | M       | 1                  |            |
| TMA2GBM67  | N       | 0                  |            |
| TMA2GBM68  | M       | 0                  |            |
| TMA2GBM69  | N       | 18                 |            |
| TMA2GBM70  | PN      | 13                 |            |
| TMA2GBM71  | M       | 1                  |            |
| TMA2GBM72  | M       | 12                 |            |
| TMA2GBM73  | PN      | 8                  |            |
| TMA2GBM74  | M       | 2                  |            |
| TMA2GBM75  | M       | 22                 |            |
| TMA2GBM76  | CL      | 22                 |            |
| TMA2GBM77  | PN      | 4                  |            |
| TMA2GBM78  | PN      | 12                 |            |
| TMA2GBM79  | PN      | 12                 |            |
| TMA2GBM80  | CL      | 13                 |            |
| TMA2GBM81  | PN      | 4                  |            |
| TMA2GBM82  | PN      | 4                  |            |
| TMA2GBM83  | N       | 10                 |            |
| TMA2GBM84  | N       | 13                 |            |
| TMA2GBM85  | N       | 33                 |            |
| TMA2GBM86  | PN      | 47                 |            |
| TMA2GBM87  | N       | 14                 |            |
| TMA2GBM88  | M       | 8                  |            |
| TMA2GBM89  | CL      | 4                  |            |
| TMA2GBM90  | M       | 60                 |            |
| TMA2GBM91  | M       | 32                 |            |
| TMA2GBM92  | PN      | 16                 |            |
| TMA2GBM93  | CL      | 5                  |            |
| TMA2GBM94  | M       | 11                 |            |
| TMA2GBM95  | CL      | 9                  |            |
| TMA2GBM96  | M       | 22                 |            |
| TMA2GBM97  | CL      | 15                 |            |
| TMA2GBM98  | CL      | 12                 |            |

**Supplementary Table S1**

**Supplementary Table S2: List of antibodies used in the study.**

| <b>Antibody</b> | <b>Company</b> | <b>Catalog #</b> | <b>Clone</b> | <b>Diluton</b> |
|-----------------|----------------|------------------|--------------|----------------|
| CD3             | LEICA          | PA0553           | LN10         | RTU            |
| CD5             | LEICA          | PA0168           |              | RTU            |
| CD4             | LEICA          | PA0427           | 4B12         | RTU            |
| CD8             | DAKO           | M7103            | C8/144B      | 1:40           |
| CD68            | LEICA          | PA0273           | 514H12       | RTU            |
| CD163           | LEICA          | NCL-L-CD163      |              | 1:50           |
| IDH             | DIANOVA        | DIA-H09          | R132H        | 1:100          |
| CD20            | DAKO           | IR60461          | L26          | RTU            |

**Supplementary Table S3: Results from Inform for each immune marker.**

| TMA ID   | CD68<br>Positivity | CD68<br>Tissue<br>Category<br>Area<br>(Tumor %) | CD163<br>Positivity | CD163<br>Tissue<br>Category<br>Area<br>(Tumor %) | CD3<br>Positivity | CD3<br>Tissue<br>Category<br>Area<br>(Tumor %) | CD4<br>Positivity | CD5<br>Tissue<br>Category<br>Area<br>(Tumor %) | CD8<br>Positivity | CD8<br>Tissue<br>Category<br>Area<br>(Tumor %) |
|----------|--------------------|-------------------------------------------------|---------------------|--------------------------------------------------|-------------------|------------------------------------------------|-------------------|------------------------------------------------|-------------------|------------------------------------------------|
| TMA1GMB1 | 0.271              | 0.6117                                          | 0.9645              | 0.4144                                           | 0.0034            | 0.6509                                         | 0.0022            | 0.6275                                         | 0.0027            | 0.6406                                         |
| TMA1GMB1 | 0.0219             | 0.5748                                          | 0.9845              | 0.5104                                           | 0.0131            | 0.5831                                         | 0.003             | 0.523                                          | 0.0092            | 0.5544                                         |
| TMA1GMB1 | 0.034              | 0.6136                                          | 0.8504              | 0.5394                                           | 0.013             | 0.635                                          |                   |                                                |                   |                                                |
| TMA1GMB2 | 0.0715             | 0.6313                                          | 0.1441              | 0.4159                                           | 0.0025            | 0.6393                                         | 0.0044            | 0.641                                          | 0.0016            | 0.6357                                         |
| TMA1GMB2 | 0.0959             | 0.6273                                          | 0.182               | 0.6024                                           | 0.0162            | 0.6327                                         | 0.0035            | 0.6164                                         | 0.0122            | 0.6159                                         |
| TMA1GMB2 | 0.078              | 0.6323                                          | 0.216               | 0.5097                                           | 0.002             | 0.6394                                         | 0.0035            | 0.6144                                         | 0.007             | 0.5789                                         |
| TMA1GMB3 | 0.0057             | 0.5717                                          | 0.013               | 0.5966                                           | 0.0066            | 0.5868                                         | 0.0024            | 0.6082                                         | 0.0062            | 0.5838                                         |
| TMA1GMB3 | 0.003              | 0.4301                                          | 0.0369              | 0.5214                                           | 0.0018            | 0.4412                                         | 0.0005            | 0.5957                                         | 0.0023            | 0.5798                                         |
| TMA1GMB3 | 0.0201             | 0.6627                                          | 0.2399              | 0.6217                                           | 0.0326            | 0.6704                                         | 0.0013            | 0.6802                                         | 0.0075            | 0.6924                                         |
| TMA1GMB4 | 0.4983             | 0.5893                                          | 0.9528              | 0.2444                                           | 0.0662            | 0.6478                                         | 0.0094            | 0.6301                                         | 0.0072            | 0.5448                                         |
| TMA1GMB4 | 0.0398             | 0.701                                           | 0.302               | 0.6397                                           | 0.0018            | 0.7014                                         | 0.0006            | 0.6985                                         | 0.0006            | 0.7018                                         |
| TMA1GMB4 | 0.0314             | 0.6881                                          | 0.4751              | 0.5678                                           | 0.0044            | 0.6893                                         | 0.0006            | 0.6797                                         | 0.0048            | 0.6754                                         |
| TMA1GMB5 | 0.1713             | 0.3959                                          | 0.3451              | 0.1098                                           | 0.0154            | 0.3082                                         | 0.0035            | 0.5507                                         | 0.0013            | 0.2893                                         |
| TMA1GMB5 | 0.4699             | 0.1952                                          | 0.4559              | 0.1934                                           | 0.0122            | 0.187                                          | 0.0023            | 0.5789                                         | 0.0015            | 0.5875                                         |
| TMA1GMB6 | 0.0921             | 0.6891                                          | 0.1868              | 0.6394                                           | 0.0051            | 0.6986                                         | 0.0015            | 0.7161                                         | 0.0007            | 0.7076                                         |
| TMA1GMB6 | 0.3193             | 0.4973                                          | 0.6269              | 0.6368                                           | 0.0439            | 0.7143                                         | 0.0101            | 0.7121                                         | 0.0196            | 0.6341                                         |
| TMA1GMB6 | 0.0451             | 0.6932                                          | 0.0358              | 0.6595                                           | 0.0024            | 0.7013                                         | 0.0001            | 0.7039                                         | 0.0006            | 0.6488                                         |
| TMA1GMB6 | 0.0391             | 0.7033                                          | 0.0417              | 0.7067                                           | 0.002             | 0.707                                          | 0.0003            | 0.6772                                         | 0.0012            | 0.6685                                         |
| TMA1GMB6 | 0.004              | 0.5353                                          | 0.0912              | 0.2419                                           | 0.0054            | 0.4767                                         | 0.0081            | 0.4035                                         | 0.0025            | 0.2731                                         |
| TMA1GMB7 | 0.1344             | 0.7026                                          | 0.1011              | 0.7153                                           | 0.0391            | 0.7258                                         | 0.0055            | 0.7178                                         | 0.0348            | 0.7283                                         |
| TMA1GMB7 | 0.0546             | 0.5547                                          | 0.1015              | 0.5641                                           | 0.0076            | 0.605                                          | 0.0023            | 0.6656                                         | 0.004             | 0.6432                                         |
| TMA1GMB7 | 0.067              | 0.729                                           | 0.0101              | 0.7399                                           | 0.0157            | 0.7446                                         | 0.0063            | 0.7255                                         | 0.0116            | 0.7268                                         |
| TMA1GMB8 | 0.2034             | 0.4094                                          | 0.6109              | 0.5218                                           | 0.0135            | 0.6759                                         | 0.0011            | 0.6866                                         | 0                 | 0.6711                                         |
| TMA1GMB8 | 0.0881             | 0.6816                                          | 0.1431              | 0.6661                                           | 0.0031            | 0.6973                                         | 0.0037            | 0.682                                          | 0.0004            | 0.6891                                         |
| TMA1GMB8 | 0.0505             | 0.6755                                          | 0.0503              | 0.5286                                           | 0.0007            | 0.6586                                         | 0.0005            | 0.6957                                         | 0.0002            | 0.6921                                         |
| TMA1GMB9 | 0.0577             | 0.6701                                          | 0.1115              | 0.6704                                           | 0.0015            | 0.6803                                         | 0.0021            | 0.5694                                         | 0.0003            | 0.557                                          |
| TMA1GMB9 | 0.1321             | 0.6781                                          | 0.4841              | 0.6393                                           | 0.0023            | 0.6787                                         | 0.0045            | 0.5301                                         | 0.0019            | 0.585                                          |
| TMAGBM10 | 0.5326             | 0.4901                                          | 0.9685              | 0.3653                                           | 0.0548            | 0.6434                                         | 0.0067            | 0.6399                                         | 0.0172            | 0.636                                          |
| TMAGBM10 | 0.4269             | 0.3848                                          | 0.9685              | 0.2299                                           | 0.0721            | 0.5874                                         | 0.0115            | 0.6394                                         | 0.0318            | 0.6295                                         |
| TMAGBM10 | 0.4727             | 0.5342                                          | 0.9071              | 0.5447                                           | 0.2073            | 0.6532                                         | 0.0326            | 0.6533                                         | 0.1202            | 0.624                                          |
| TMAGBM11 | 0.0217             | 0.7046                                          | 0.0044              | 0.7046                                           | 0.0017            | 0.6981                                         | 0.0002            | 0.6987                                         | 0.0006            | 0.6964                                         |
| TMAGBM11 | 0.0163             | 0.6066                                          | 0.0183              | 0.614                                            | 0.0036            | 0.6213                                         | 0.0054            | 0.6244                                         | 0.0124            | 0.6094                                         |
| TMAGBM11 | 0.0379             | 0.1613                                          | 0.1133              | 0.4801                                           | 0.013             | 0.3612                                         | 0.009             | 0.3662                                         | 0.0009            | 0.2744                                         |
| TMAGBM12 | 0.0154             | 0.6212                                          | 0.2692              | 0.5545                                           | 0.0064            | 0.6554                                         | 0.0041            | 0.6397                                         | 0.0003            | 0.6048                                         |
| TMAGBM12 | 0.0201             | 0.3753                                          | 0.2081              | 0.4175                                           | 0.0128            | 0.4646                                         | 0.0046            | 0.5009                                         | 0.0009            | 0.4783                                         |
| TMAGBM12 | 0.0411             | 0.6538                                          | 0.2633              | 0.6127                                           | 0.0032            | 0.6709                                         | 0.0057            | 0.6687                                         | 0.0003            | 0.5956                                         |

**Supplementary Table S3: Results from Inform for each immune marker.**

| TMA ID   | CD68<br>Positivity | CD68<br>Tissue<br>Category<br>Area<br>(Tumor %) | CD163<br>Positivity | CD163<br>Tissue<br>Category<br>Area<br>(Tumor %) | CD3<br>Positivity | CD3<br>Tissue<br>Category<br>Area<br>(Tumor %) | CD4<br>Positivity | CD5<br>Tissue<br>Category<br>Area<br>(Tumor %) | CD8<br>Positivity | CD8<br>Tissue<br>Category<br>Area<br>(Tumor %) |
|----------|--------------------|-------------------------------------------------|---------------------|--------------------------------------------------|-------------------|------------------------------------------------|-------------------|------------------------------------------------|-------------------|------------------------------------------------|
| TMAGBM13 | 0.0547             | 0.6636                                          | 0.0109              | 0.6726                                           | 0.0009            | 0.6666                                         | 0.0001            | 0.6795                                         | 0.0002            | 0.6877                                         |
| TMAGBM13 | 0.1059             | 0.6235                                          | 0.0499              | 0.6387                                           | 0.0036            | 0.6372                                         | 0.0018            | 0.6356                                         | 0.0007            | 0.6342                                         |
| TMAGBM13 | 0.1294             | 0.5001                                          | 0.0806              | 0.6114                                           | 0.0022            | 0.613                                          | 0.0007            | 0.6314                                         | 0.0001            | 0.6406                                         |
| TMAGBM14 | 0.0682             | 0.6869                                          | 0.208               | 0.6008                                           | 0.02              | 0.6907                                         | 0.0035            | 0.6869                                         | 0.0112            | 0.6953                                         |
| TMAGBM14 | 0.0311             | 0.5341                                          | 0.1474              | 0.5226                                           | 0.0085            | 0.5862                                         | 0.0046            | 0.5246                                         | 0.0042            | 0.5285                                         |
| TMAGBM14 | 0.0666             | 0.6883                                          | 0.0577              | 0.6716                                           | 0.0051            | 0.6952                                         | 0.0043            | 0.6362                                         | 0.006             | 0.6701                                         |
| TMAGBM15 | 0.0102             | 0.6214                                          | 0.0078              | 0.5441                                           | 0.008             | 0.3584                                         | 0.0001            | 0.5534                                         | 0.0017            | 0.3589                                         |
| TMAGBM15 | 0.0006             | 0.6004                                          | 0.0087              | 0.614                                            | 0.003             | 0.6163                                         | 0.0028            | 0.4238                                         | 0                 | 0.4651                                         |
| TMAGBM15 | 0.1406             | 0.6032                                          | 0.9739              | 0.4563                                           | 0.0314            | 0.5833                                         | 0.0082            | 0.6267                                         | 0                 | 0.6464                                         |
| TMAGBM16 | 0.0906             | 0.6118                                          | 0.3708              | 0.6002                                           | 0.0008            | 0.6485                                         | 0.0004            | 0.6441                                         | 0.0011            | 0.6204                                         |
| TMAGBM16 | 0.1364             | 0.3569                                          | 0.4532              | 0.1222                                           | 0.0047            | 0.2249                                         | 0.003             | 0.5283                                         | 0.0012            | 0.2135                                         |
| TMAGBM16 | 0.0934             | 0.5101                                          | 0.2533              | 0.1371                                           | 0.056             | 0.1939                                         | 0.0037            | 0.4841                                         | 0.0034            | 0.2455                                         |
| TMAGBM16 | 0.0381             | 0.7323                                          | 0.1584              | 0.7069                                           | 0.0001            | 0.7273                                         | 0                 | 0.7077                                         | 0.0003            | 0.7075                                         |
| TMAGBM16 | 0.025              | 0.7236                                          | 0.0465              | 0.6968                                           | 0.002             | 0.7341                                         | 0                 | 0.7094                                         | 0.0017            | 0.704                                          |
| TMAGBM16 | 0.0333             | 0.6738                                          | 0.2155              | 0.6152                                           | 0.0025            | 0.6752                                         | 0.0011            | 0.5937                                         | 0.0019            | 0.5852                                         |
| TMAGBM17 | 0.1638             | 0.4824                                          | 0.3018              | 0.3727                                           | 0.0198            | 0.5523                                         | 0.0023            | 0.6376                                         | 0.0024            | 0.6329                                         |
| TMAGBM17 | 0.1445             | 0.5745                                          | 0.79                | 0.5255                                           | 0.0047            | 0.5957                                         | 0.0009            | 0.5871                                         | 0                 | 0.6109                                         |
| TMAGBM17 | 0.168              | 0.5287                                          | 0.615               | 0.4996                                           | 0.0077            | 0.5692                                         | 0.0121            | 0.5753                                         | 0                 | 0.5655                                         |
| TMAGBM18 | 0.1915             | 0.1912                                          | 0.4751              | 0.2474                                           | 0.0413            | 0.2616                                         | 0.0185            | 0.596                                          | 0.0459            | 0.5951                                         |
| TMAGBM18 | 0.0512             | 0.6325                                          | 0.0118              | 0.6399                                           | 0.0019            | 0.6358                                         | 0.0018            | 0.6543                                         | 0.0039            | 0.6575                                         |
| TMAGBM18 | 0.0296             | 0.4818                                          | 0.1357              | 0.5113                                           | 0.004             | 0.5044                                         | 0.0116            | 0.6008                                         | 0.003             | 0.5903                                         |
| TMAGBM19 | 0.3716             | 0.5878                                          | 0.7323              | 0.5281                                           | 0.0903            | 0.6259                                         | 0.0093            | 0.6034                                         | 0.0427            | 0.6124                                         |
| TMAGBM19 | 0.3452             | 0.5289                                          | 0.9596              | 0.4525                                           | 0.1786            | 0.6187                                         | 0.0133            | 0.6207                                         | 0.1172            | 0.6277                                         |
| TMAGBM19 | 0.5644             | 0.5048                                          | 0.7873              | 0.57                                             | 0.0466            | 0.6005                                         | 0.021             | 0.5799                                         | 0.0161            | 0.5971                                         |
| TMAGBM19 | 0.5344             | 0.5851                                          | 0.7813              | 0.5782                                           | 0.0319            | 0.6177                                         | 0.0057            | 0.6118                                         | 0.0312            | 0.6322                                         |
| TMAGBM20 | 0.1031             | 0.5988                                          | 0.0054              | 0.5876                                           | 0.0018            | 0.6032                                         | 0.0015            | 0.5888                                         | 0.0019            | 0.6082                                         |
| TMAGBM20 | 0.0056             | 0.6213                                          | 0.0112              | 0.6306                                           | 0.0039            | 0.6289                                         | 0.0015            | 0.6208                                         | 0.002             | 0.6427                                         |
| TMAGBM20 | 0.0611             | 0.5943                                          | 0.0853              | 0.9819                                           | 0.0017            | 0.693                                          | 0.0008            | 0.6754                                         | 0.0008            | 0.6935                                         |
| TMAGBM21 | 0.8151             | 0.3243                                          | 0.782               | 0.6983                                           | 0.0156            | 0.7161                                         | 0.0251            | 0.6986                                         | 0.0021            | 0.7113                                         |
| TMAGBM21 | 0.8505             | 0.0615                                          | 0.8261              | 0.4132                                           | 0.0246            | 0.6459                                         | 0.0164            | 0.628                                          | 0.0024            | 0.5871                                         |
| TMAGBM21 | 0.8792             | 0.1382                                          | 0.8671              | 0.6077                                           | 0.0464            | 0.6655                                         | 0.0215            | 0.6335                                         | 0.0044            | 0.6137                                         |
| TMAGBM22 | 0.667              | 0.398                                           | 0.4183              | 0.9783                                           | 0.0257            | 0.6848                                         | 0.014             | 0.6637                                         | 0.0037            | 0.6807                                         |
| TMAGBM22 | 0.6088             | 0.2737                                          | 0.2441              | 0.9728                                           | 0.0398            | 0.6651                                         | 0.0208            | 0.6582                                         | 0.0066            | 0.6583                                         |
| TMAGBM22 | 0.5082             | 0.375                                           | 0.6281              | 0.9232                                           | 0.0339            | 0.6814                                         | 0.0238            | 0.6692                                         | 0.0062            | 0.6787                                         |
| TMAGBM23 | 0.8103             | 0.655                                           | 0.1393              | 0.9929                                           | 0.0094            | 0.748                                          | 0.0024            | 0.7595                                         | 0.0068            | 0.7364                                         |
| TMAGBM23 | 0.0526             | 0.1317                                          | 0.0936              | 0.9937                                           | 0.0048            | 0.7372                                         | 0.0075            | 0.7419                                         | 0.0178            | 0.7297                                         |
| TMAGBM23 | 0.2579             | 0.5625                                          | 0.2026              | 0.8991                                           | 0.0082            | 0.713                                          | 0.0024            | 0.6829                                         | 0.0043            | 0.6957                                         |

**Supplementary Table S3: Results from Inform for each immune marker.**

| TMA ID   | CD68<br>Positivity | CD68<br>Tissue<br>Category<br>Area<br>(Tumor %) | CD163<br>Positivity | CD163<br>Tissue<br>Category<br>Area<br>(Tumor %) | CD3<br>Positivity | CD3<br>Tissue<br>Category<br>Area<br>(Tumor %) | CD4<br>Positivity | CD5<br>Tissue<br>Category<br>Area<br>(Tumor %) | CD8<br>Positivity | CD8<br>Tissue<br>Category<br>Area<br>(Tumor %) |
|----------|--------------------|-------------------------------------------------|---------------------|--------------------------------------------------|-------------------|------------------------------------------------|-------------------|------------------------------------------------|-------------------|------------------------------------------------|
| TMAGBM24 | 0.0862             | 0.5821                                          | 0.0672              | 0.9458                                           | 0.004             | 0.6602                                         | 0.0117            | 0.627                                          | 0.001             | 0.6364                                         |
| TMAGBM24 | 0.1547             | 0.6553                                          | 0.1508              | 0.9925                                           | 0.0051            | 0.6855                                         | 0.0028            | 0.652                                          | 0.0031            | 0.6705                                         |
| TMAGBM24 | 0.1359             | 0.6444                                          | 0.129               | 0.9895                                           | 0.0016            | 0.6697                                         | 0.001             | 0.629                                          | 0.0027            | 0.6507                                         |
| TMAGBM25 | 0.0781             | 0.5654                                          | 0.0094              | 0.9918                                           | 0.0014            | 0.6966                                         | 0                 | 0.6727                                         | 0.0051            | 0.6716                                         |
| TMAGBM25 | 0.0845             | 0.6172                                          | 0.0334              | 0.9929                                           | 0.0003            | 0.6821                                         | 0.0005            | 0.6656                                         | 0.0031            | 0.6759                                         |
| TMAGBM25 | 0.1467             | 0.6439                                          | 0.0032              | 0.9971                                           | 0.0007            | 0.6865                                         | 0.0004            | 0.6469                                         | 0.0032            | 0.6818                                         |
| TMAGBM26 | 0.3801             | 0.2089                                          | 0.5373              | 0.9007                                           | 0.0034            | 0.6706                                         | 0.0014            | 0.6392                                         | 0.0015            | 0.4543                                         |
| TMAGBM26 | 0.3378             | 0.3529                                          | 0.645               | 0.8958                                           | 0.0063            | 0.6458                                         | 0.0098            | 0.6244                                         | 0.0013            | 0.4151                                         |
| TMAGBM26 | 0.7826             | 0.0889                                          | 0.6155              | 0.7876                                           | 0.0039            | 0.6381                                         | 0                 | 0.5311                                         | 0.0053            | 0.5268                                         |
| TMAGBM27 | 0.1443             | 0.7142                                          | 0.344               | 0.9887                                           | 0.0117            | 0.7466                                         | 0.0048            | 0.7457                                         | 0.0102            | 0.7359                                         |
| TMAGBM27 | 0.0278             | 0.7062                                          | 0.0226              | 0.9985                                           | 0.002             | 0.7399                                         | 0.001             | 0.7268                                         | 0.0099            | 0.7309                                         |
| TMAGBM27 | 0.1015             | 0.6765                                          | 0.0466              | 0.9886                                           | 0.0021            | 0.7222                                         | 0.0006            | 0.7086                                         | 0.0126            | 0.7132                                         |
| TMAGBM28 | 0.2314             | 0.5643                                          | 0.1396              | 0.9848                                           | 0.0023            | 0.6659                                         | 0.0005            | 0.6561                                         | 0.0035            | 0.6039                                         |
| TMAGBM28 | 0.3324             | 0.4351                                          | 0.2417              | 0.9363                                           | 0.0059            | 0.6138                                         | 0.0043            | 0.5784                                         | 0.0013            | 0.5604                                         |
| TMAGBM28 | 0.6799             | 0.2128                                          | 0.125               | 0.874                                            | 0.0044            | 0.4468                                         | 0.0045            | 0.5102                                         | 0.0026            | 0.4456                                         |
| TMAGBM29 | 0.1797             | 0.6561                                          | 0.6763              | 0.9186                                           | 0.0015            | 0.6857                                         | 0.0013            | 0.6771                                         | 0.0009            | 0.6991                                         |
| TMAGBM29 | 0.1025             | 0.6102                                          | 0.3771              | 0.9295                                           | 0.0101            | 0.6796                                         | 0.0016            | 0.6728                                         | 0.0021            | 0.6951                                         |
| TMAGBM29 | 0.0829             | 0.6471                                          | 0.2231              | 0.9805                                           | 0.0003            | 0.6757                                         | 0                 | 0.6429                                         |                   |                                                |
| TMAGBM30 | 0.0267             | 0.5783                                          | 0.1219              | 0.9447                                           | 0.0016            | 0.6649                                         | 0.0017            | 0.6479                                         | 0.0212            | 0.676                                          |
| TMAGBM30 | 0.2348             | 0.4946                                          | 0.0112              | 0.992                                            | 0.0029            | 0.3394                                         |                   |                                                |                   |                                                |
| TMAGBM30 | 0.0253             | 0.4799                                          | 0.0225              | 0.9745                                           | 0.0111            | 0.639                                          | 0                 | 0.3654                                         | 0.0226            | 0.6268                                         |
| TMAGBM30 | 0.282              | 0.6131                                          | 0.0278              | 0.993                                            | 0.0066            | 0.6604                                         | 0.0029            | 0.6523                                         | 0.0059            | 0.6583                                         |
| TMAGBM31 | 0.396              | 0.3177                                          | 0.959               | 0.4228                                           | 0.028             | 0.667                                          | 0.025             | 0.647                                          | 0.0131            | 0.4874                                         |
| TMAGBM31 | 0.1423             | 0.5956                                          | 0.9639              | 0.6973                                           | 0.0277            | 0.6782                                         | 0.0325            | 0.6686                                         | 0.0101            | 0.6074                                         |
| TMAGBM31 | 0.3009             | 0.566                                           | 0.8654              | 0.6165                                           | 0.0125            | 0.6881                                         | 0.0099            | 0.6706                                         | 0.0041            | 0.6209                                         |
| TMAGBM31 | 0                  | 0.3226                                          | 0.1678              | 0.9387                                           | 0.0022            | 0.718                                          | 0.0007            | 0.6913                                         | 0.0002            | 0.7164                                         |
| TMAGBM32 | 0.0846             | 0.6434                                          | 0.0545              | 0.9969                                           | 0.0035            | 0.6771                                         | 0.0005            | 0.6507                                         | 0.0024            | 0.6791                                         |
| TMAGBM32 | 0.0903             | 0.651                                           | 0.0671              | 0.9955                                           | 0.0079            | 0.6855                                         | 0.0017            | 0.6572                                         | 0.0033            | 0.6828                                         |
| TMAGBM32 | 0.0554             | 0.1755                                          | 0.0564              | 0.8497                                           | 0.0364            | 0.3703                                         | 0.0025            | 0.4855                                         | 0.0063            | 0.3702                                         |
| TMAGBM33 | 0.1046             | 0.5791                                          | 0.0055              | 0.9854                                           | 0.0039            | 0.6347                                         | 0.0017            | 0.5894                                         | 0.0019            | 0.459                                          |
| TMAGBM33 | 0.1186             | 0.5973                                          | 0.0073              | 0.9813                                           | 0.0047            | 0.6566                                         | 0.0067            | 0.6041                                         | 0.0068            | 0.6474                                         |
| TMAGBM33 | 0.2295             | 0.5526                                          | 0.1847              | 0.956                                            | 0.0074            | 0.626                                          | 0.001             | 0.5922                                         | 0.0094            | 0.5775                                         |
| TMAGBM34 | 0.2397             | 0.5586                                          | 0.3144              | 0.9359                                           | 0.0023            | 0.6675                                         | 0.0021            | 0.6699                                         | 0.0014            | 0.648                                          |
| TMAGBM34 | 0.0735             | 0.359                                           | 0.0207              | 0.9743                                           | 0.0051            | 0.6178                                         | 0.0015            | 0.5973                                         | 0.0023            | 0.5795                                         |
| TMAGBM34 | 0.2385             | 0.4923                                          | 0.3514              | 0.9214                                           | 0.0059            | 0.6982                                         | 0.0041            | 0.6994                                         | 0.0013            | 0.666                                          |
| TMAGBM34 | 0.0502             | 0.6376                                          | 0.009               | 0.9946                                           | 0.0039            | 0.6878                                         | 0.0051            | 0.6777                                         | 0.0034            | 0.6938                                         |
| TMAGBM35 | 0.0292             | 0.6968                                          | 0.0452              | 0.9932                                           | 0.0007            | 0.7769                                         | 0.0005            | 0.7801                                         | 0.0001            | 0.7797                                         |



**Supplementary Table S3: Results from Inform for each immune marker.**

| TMA ID   | CD68<br>Positivity | CD68<br>Tissue<br>Category<br>Area<br>(Tumor %) | CD163<br>Positivity | CD163<br>Tissue<br>Category<br>Area<br>(Tumor %) | CD3<br>Positivity | CD3<br>Tissue<br>Category<br>Area<br>(Tumor %) | CD4<br>Positivity | CD5<br>Tissue<br>Category<br>Area<br>(Tumor %) | CD8<br>Positivity | CD8<br>Tissue<br>Category<br>Area<br>(Tumor %) |
|----------|--------------------|-------------------------------------------------|---------------------|--------------------------------------------------|-------------------|------------------------------------------------|-------------------|------------------------------------------------|-------------------|------------------------------------------------|
| TMAGBM35 | 0.1407             | 0.322                                           | 0.2412              | 0.9408                                           | 0.0094            | 0.5022                                         | 0.004             | 0.4212                                         | 0.0028            | 0.4906                                         |
| TMAGBM35 | 0.0034             | 0.5426                                          | 0.0023              | 0.991                                            | 0.002             | 0.6959                                         | 0.0005            | 0.6315                                         | 0.0004            | 0.6552                                         |
| TMAGBM36 | 0.4107             | 0.4096                                          | 0.0216              | 0.9116                                           | 0.0039            | 0.6861                                         | 0.0023            | 0.6712                                         | 0.0021            | 0.6951                                         |
| TMAGBM36 | 0.1744             | 0.5722                                          | 0.1995              | 0.956                                            | 0.0059            | 0.6653                                         | 0.002             | 0.6525                                         | 0.0011            | 0.6715                                         |
| TMAGBM36 | 0.502              | 0.3526                                          | 0.1986              | 0.9462                                           | 0.0054            | 0.6382                                         | 0.0024            | 0.4741                                         | 0.0007            | 0.6201                                         |
| TMAGBM36 | 0.1373             | 0.5875                                          | 0.0672              | 0.9897                                           | 0.0027            | 0.6808                                         | 0.0009            | 0.6677                                         | 0.0004            | 0.6933                                         |
| TMAGBM36 | 0.1502             | 0.5508                                          | 0.3413              | 0.7202                                           | 0.011             | 0.6501                                         | 0.0038            | 0.6464                                         | 0.0004            | 0.6573                                         |
| TMAGBM37 | 0.0587             | 0.6712                                          | 0.0572              | 0.9844                                           | 0.0053            | 0.7206                                         | 0                 | 0.7106                                         | 0.0074            | 0.722                                          |
| TMAGBM37 | 0.0737             | 0.663                                           | 0.0674              | 0.9938                                           | 0.0026            | 0.7266                                         | 0.0008            | 0.7273                                         | 0.0028            | 0.7342                                         |
| TMAGBM37 | 0.0966             | 0.6335                                          | 0.0994              | 0.9936                                           | 0.0031            | 0.6878                                         |                   |                                                | 0.002             | 0.3907                                         |
| TMAGBM37 | 0.081              | 0.6706                                          | 0.1636              | 0.9751                                           | 0.0047            | 0.7038                                         | 0.0017            | 0.6825                                         | 0.0016            | 0.713                                          |
| TMAGBM37 | 0.0127             | 0.6312                                          | 0.0868              | 0.9712                                           | 0.0028            | 0.6737                                         | 0                 | 0.6525                                         | 0.0006            | 0.6792                                         |
| TMAGBM38 | 0.0102             | 0.2767                                          | 0.0063              | 0.9334                                           | 0.0017            | 0.458                                          | 0.0007            | 0.4509                                         | 0.0004            | 0.4473                                         |
| TMAGBM38 | 0.0447             | 0.6569                                          | 0.0004              | 0.9944                                           | 0.0013            | 0.6917                                         | 0.0004            | 0.6868                                         | 0.0013            | 0.6583                                         |
| TMAGBM38 | 0.164              | 0.3793                                          | 0.0292              | 0.739                                            | 0.0278            | 0.5978                                         | 0.0089            | 0.5943                                         | 0.0135            | 0.4349                                         |
| TMAGBM38 | 0.0397             | 0.3238                                          | 0.0036              | 0.9901                                           | 0.0009            | 0.6564                                         | 0.0034            | 0.6536                                         | 0.0067            | 0.6587                                         |
| TMAGBM39 | 0.0435             | 0.4901                                          | 0.1698              | 0.9444                                           | 0.0257            | 0.6215                                         | 0.0007            | 0.6348                                         | 0.0007            | 0.6363                                         |
| TMAGBM39 | 0.4021             | 0.1974                                          | 0.0091              | 0.9682                                           | 0.0122            | 0.6278                                         | 0.0135            | 0.6751                                         | 0.005             | 0.6508                                         |
| TMAGBM39 | 0.2806             | 0.4149                                          | 0.0442              | 0.971                                            | 0.0294            | 0.6503                                         | 0.0017            | 0.6658                                         | 0.0048            | 0.6528                                         |
| TMAGBM40 | 0.2058             | 0.3537                                          | 0.2164              | 0.924                                            | 0.0044            | 0.5902                                         | 0.0019            | 0.611                                          | 0.0031            | 0.619                                          |
| TMAGBM40 | 0.0433             | 0.2225                                          | 0.0057              | 0.9743                                           | 0.0068            | 0.5957                                         | 0.0027            | 0.6144                                         | 0.0024            | 0.6115                                         |
| TMAGBM40 | 0.1559             | 0.4652                                          | 0.1098              | 0.8595                                           | 0.0112            | 0.6262                                         | 0.0211            | 0.6388                                         | 0.0166            | 0.6224                                         |
| TMAGBM41 | 0.7062             | 0.3463                                          | 0.5876              | 0.7373                                           | 0.0096            | 0.2634                                         |                   |                                                |                   |                                                |
| TMAGBM41 | 0.2175             | 0.2062                                          | 0.875               | 0.4579                                           | 0.0086            | 0.5854                                         | 0.0037            | 0.5799                                         | 0.0031            | 0.5486                                         |
| TMAGBM41 | 0.1155             | 0.6627                                          | 0.058               | 0.9968                                           | 0.0036            | 0.6661                                         | 0                 | 0.6845                                         | 0.0007            | 0.6798                                         |
| TMAGBM41 | 0.0725             | 0.589                                           | 0.0273              | 0.9953                                           | 0.0024            | 0.6399                                         | 0.001             | 0.6509                                         | 0.0004            | 0.6497                                         |
| TMAGBM41 | 0.0824             | 0.5088                                          | 0.2483              | 0.9163                                           | 0.0214            | 0.6248                                         | 0.0059            | 0.6543                                         | 0.0059            | 0.6314                                         |
| TMAGBM42 | 0.0892             | 0.6013                                          | 0.0248              | 0.9958                                           | 0.0026            | 0.6685                                         | 0.0011            | 0.6691                                         | 0.0002            | 0.6698                                         |
| TMAGBM42 | 0.0423             | 0.5987                                          | 0.0488              | 0.9908                                           | 0.002             | 0.6847                                         | 0.0009            | 0.6822                                         | 0.0003            | 0.6757                                         |
| TMAGBM42 | 0.0637             | 0.576                                           | 0.0397              | 0.9932                                           | 0.0065            | 0.6518                                         | 0.0075            | 0.6513                                         | 0.0031            | 0.6427                                         |
| TMAGBM43 | 0.0122             | 0.6004                                          | 0.3045              | 0.9238                                           | 0.0005            | 0.614                                          | 0.001             | 0.6175                                         | 0.0126            | 0.6062                                         |
| TMAGBM43 | 0.0081             | 0.6777                                          | 0.0886              | 0.9902                                           | 0.0008            | 0.7044                                         | 0.0002            | 0.7113                                         | 0                 | 0.7016                                         |
| TMAGBM43 | 0.0164             | 0.6326                                          | 0.2174              | 0.9656                                           | 0.0011            | 0.6591                                         | 0.0004            | 0.677                                          | 0.0002            | 0.6666                                         |
| TMAGBM43 | 0.0192             | 0.3626                                          | 0.2396              | 0.6707                                           | 0.0028            | 0.5562                                         | 0.0007            | 0.5745                                         | 0.0041            | 0.5532                                         |
| TMAGBM43 | 0.0589             | 0.5113                                          | 0.034               | 0.9828                                           | 0.0008            | 0.6642                                         | 0.0003            | 0.6701                                         | 0.0003            | 0.6587                                         |
| TMAGBM44 | 0.795              | 0.3583                                          | 0.9184              | 0.4901                                           |                   |                                                |                   |                                                | 0.0147            | 0.3298                                         |
| TMAGBM44 | 0.0651             | 0.5179                                          | 0.3874              | 0.9421                                           |                   |                                                | 0.0026            | 0.7103                                         | 0.0021            | 0.7027                                         |

**Supplementary Table S3: Results from Inform for each immune marker.**

| TMA ID   | CD68<br>Positivity | CD68<br>Tissue<br>Category<br>Area<br>(Tumor %) | CD163<br>Positivity | CD163<br>Tissue<br>Category<br>Area<br>(Tumor %) | CD3<br>Positivity | CD3<br>Tissue<br>Category<br>Area<br>(Tumor %) | CD4<br>Positivity | CD5<br>Tissue<br>Category<br>Area<br>(Tumor %) | CD8<br>Positivity | CD8<br>Tissue<br>Category<br>Area<br>(Tumor %) |
|----------|--------------------|-------------------------------------------------|---------------------|--------------------------------------------------|-------------------|------------------------------------------------|-------------------|------------------------------------------------|-------------------|------------------------------------------------|
| TMAGBM44 | 0.0637             | 0.5532                                          | 0.4367              | 0.9449                                           | 0.0079            | 0.4997                                         | 0.0017            | 0.697                                          | 0.0027            | 0.686                                          |
| TMAGBM45 | 0.0771             | 0.5095                                          | 0.7934              | 0.9596                                           | 0.0044            | 0.6199                                         | 0.0007            | 0.6417                                         | 0.0006            | 0.6457                                         |
| TMAGBM45 | 0.0371             | 0.1208                                          | 0.713               | 0.6089                                           |                   |                                                | 0.0052            | 0.64                                           |                   |                                                |
| TMAGBM45 | 0.2057             | 0.1665                                          | 0.1034              | 0.956                                            | 0.0221            | 0.2234                                         | 0.012             | 0.6838                                         | 0.0019            | 0.6673                                         |
| TMAGBM46 | 0.0798             | 0.6429                                          | 0.1726              | 0.9936                                           | 0.0027            | 0.6519                                         | 0.002             | 0.6754                                         | 0.0016            | 0.6718                                         |
| TMAGBM46 | 0.071              | 0.6337                                          | 0.0676              | 0.9913                                           | 0.01              | 0.6229                                         | 0.0012            | 0.675                                          | 0.0009            | 0.6669                                         |
| TMAGBM46 | 0.2843             | 0.4455                                          | 0.2279              | 0.9085                                           | 0.0083            | 0.6506                                         | 0.0025            | 0.6571                                         | 0.0017            | 0.6223                                         |
| TMAGBM46 | 0.022              | 0.3552                                          | 0.1828              | 0.9508                                           | 0.0053            | 0.6124                                         | 0.0011            | 0.6229                                         | 0.0014            | 0.5716                                         |
| TMAGBM47 | 0.0276             | 0.5594                                          | 0.0859              | 0.9793                                           | 0.0007            | 0.6263                                         | 0.0002            | 0.6565                                         | 0.0001            | 0.6504                                         |
| TMAGBM47 | 0.0744             | 0.5234                                          | 0.0071              | 0.9941                                           | 0.0012            | 0.6271                                         | 0.0004            | 0.6297                                         | 0.0007            | 0.6221                                         |
| TMAGBM47 | 0.129              | 0.5545                                          | 0.1635              | 0.993                                            | 0.0039            | 0.6618                                         | 0.0007            | 0.6663                                         | 0.0002            | 0.6688                                         |
| TMAGBM47 | 0.2844             | 0.3116                                          | 0.2721              | 0.9005                                           | 0.0225            | 0.5131                                         | 0.0233            | 0.4785                                         | 0.0123            | 0.4251                                         |
| TMAGBM47 | 0.1371             | 0.6193                                          | 0.1075              | 0.9956                                           | 0.0058            | 0.6722                                         | 0.003             | 0.6862                                         | 0.0017            | 0.6769                                         |
| TMAGBM48 | 0.7144             | 0.213                                           | 0.9286              | 0.8361                                           |                   |                                                | 0.0102            | 0.1528                                         | 0.0053            | 0.0839                                         |
| TMAGBM48 | 0.0729             | 0.2148                                          | 0.4412              | 0.3592                                           | 0.0209            | 0.6648                                         | 0.0076            | 0.6817                                         | 0.0029            | 0.668                                          |
| TMAGBM48 | 0.1267             | 0.3064                                          | 0.2578              | 0.4659                                           | 0.0031            | 0.6447                                         | 0.0025            | 0.6719                                         | 0.0015            | 0.6646                                         |
| TMAGBM49 | 0.045              | 0.5598                                          | 0.0431              | 0.9799                                           | 0.0016            | 0.6126                                         | 0.0031            | 0.5988                                         | 0.0005            | 0.591                                          |
| TMAGBM49 | 0.049              | 0.6062                                          | 0.0177              | 0.9919                                           | 0.0017            | 0.6293                                         | 0.0016            | 0.643                                          | 0.0003            | 0.6422                                         |
| TMAGBM49 | 0.0207             | 0.4297                                          | 0.1042              | 0.9297                                           | 0.0002            | 0.5573                                         | 0.0022            | 0.5129                                         | 0.0006            | 0.4208                                         |
| TMAGBM50 | 0.1463             | 0.3265                                          | 0.7938              | 0.7015                                           | 0.0052            | 0.6495                                         | 0.0013            | 0.6619                                         | 0.0003            | 0.6719                                         |
| TMAGBM50 | 0.1418             | 0.3347                                          | 0.421               | 0.7559                                           | 0.055             | 0.59                                           | 0.0165            | 0.6218                                         | 0.0049            | 0.488                                          |
| TMAGBM50 | 0.0812             | 0.236                                           | 0.0979              | 0.9589                                           | 0.0026            | 0.2027                                         | 0.0008            | 0.3786                                         | 0.0009            | 0.3854                                         |
| TMAGBM51 | 0.7654             | 0.5578                                          | 1                   | 0.3002                                           | 0.0389            | 0.6584                                         | 0.0484            | 0.6875                                         | 0.0104            | 0.6826                                         |
| TMAGBM51 | 0.9413             | 0.177                                           | 0.9403              | 0.7162                                           | 0.0239            | 0.5852                                         | 0.0354            | 0.6161                                         | 0                 | 0.2149                                         |
| TMAGBM51 | 0.884              | 0.2756                                          | 0.9259              | 0.4984                                           | 0.0267            | 0.6                                            | 0.0051            | 0.6308                                         | 0.0013            | 0.3406                                         |
| TMAGBM52 | 0.149              | 0.5915                                          | 0.155               | 0.9665                                           | 0.0034            | 0.6712                                         | 0.0018            | 0.6742                                         | 0.0004            | 0.6623                                         |
| TMAGBM52 | 0.0346             | 0.6148                                          | 0.1553              | 0.9767                                           | 0.0051            | 0.6384                                         | 0.0031            | 0.6649                                         | 0.0006            | 0.6533                                         |
| TMAGBM52 | 0.0837             | 0.4857                                          | 0.4362              | 0.7794                                           | 0.0176            | 0.6749                                         | 0.0099            | 0.6871                                         | 0.0002            | 0.6648                                         |
| TMAGBM53 | 0.2972             | 0.2062                                          | 1                   | 0.4058                                           | 0.0282            | 0.5588                                         | 0.0248            | 0.5159                                         | 0.0041            | 0.437                                          |
| TMAGBM53 | 0.4353             | 0.339                                           | 1                   | 0.3691                                           | 0.0347            | 0.6074                                         | 0.0277            | 0.6282                                         | 0.0028            | 0.57                                           |
| TMAGBM53 | 0.0877             | 0.3754                                          | 0.1967              | 0.7491                                           | 0.0085            | 0.6226                                         | 0.0046            | 0.6254                                         | 0.0014            | 0.5992                                         |
| TMAGBM54 | 0.7016             | 0.651                                           | 1                   | 0.2893                                           | 0.0765            | 0.6621                                         | 0.0258            | 0.6803                                         | 0.0287            | 0.6701                                         |
| TMAGBM54 | 0.1703             | 0.3695                                          | 1                   | 0.3387                                           | 0.0295            | 0.6298                                         | 0.0136            | 0.6573                                         | 0.0208            | 0.464                                          |
| TMAGBM54 | 0.3803             | 0.292                                           | 0.7073              | 0.3409                                           | 0.0193            | 0.6785                                         | 0.0169            | 0.6731                                         | 0.0089            | 0.6382                                         |
| TMAGBM54 | 0.3401             | 0.5339                                          | 0.8357              | 0.5285                                           | 0.0182            | 0.6617                                         | 0.0069            | 0.6947                                         | 0.0124            | 0.7031                                         |
| TMAGBM55 | 0.1986             | 0.548                                           | 0.7458              | 0.8636                                           | 0.0189            | 0.5969                                         | 0.0172            | 0.5959                                         | 0.004             | 0.5738                                         |
| TMAGBM55 | 0.3601             | 0.392                                           | 0.9212              | 0.7976                                           | 0.0321            | 0.6242                                         | 0.0137            | 0.6222                                         | 0.0072            | 0.6124                                         |

**Supplementary Table S3: Results from Inform for each immune marker.**

| TMA ID    | CD68<br>Positivity | CD68<br>Tissue<br>Category<br>Area<br>(Tumor %) | CD163<br>Positivity | CD163<br>Tissue<br>Category<br>Area<br>(Tumor %) | CD3<br>Positivity | CD3<br>Tissue<br>Category<br>Area<br>(Tumor %) | CD4<br>Positivity | CD5<br>Tissue<br>Category<br>Area<br>(Tumor %) | CD8<br>Positivity | CD8<br>Tissue<br>Category<br>Area<br>(Tumor %) |
|-----------|--------------------|-------------------------------------------------|---------------------|--------------------------------------------------|-------------------|------------------------------------------------|-------------------|------------------------------------------------|-------------------|------------------------------------------------|
| TMAGBM55  | 0.5861             | 0.3382                                          | 0.6684              | 0.5966                                           | 0.036             | 0.3325                                         |                   |                                                |                   |                                                |
| TMAGBM55  | 0.1166             | 0.3095                                          | 0.6108              | 0.9148                                           | 0.0222            | 0.6229                                         | 0.0119            | 0.6085                                         | 0.0058            | 0.6243                                         |
| TMAGBM56  | 0.147              | 0.3491                                          | 0.446               | 0.8715                                           | 0.0044            | 0.6249                                         |                   |                                                | 0.0015            | 0.6198                                         |
| TMAGBM56  | 0.4961             | 0.2151                                          | 0.7323              | 0.6327                                           | 0.0008            | 0.5883                                         | 0.0012            | 0.5882                                         | 0                 | 0.5603                                         |
| TMAGBM56  | 0.3282             | 0.1324                                          | 0.3049              | 0.772                                            | 0.0056            | 0.5025                                         | 0.0552            | 0.2953                                         | 0.0019            | 0.3377                                         |
| TMA2GBM57 | 0.6132             | 0.518                                           | 0.9931              | 0.514                                            | 0.0095            | 0.4814                                         | 0.0155            | 0.4381                                         | 0.0128            | 0.4489                                         |
| TMA2GBM57 | 0.179              | 0.6933                                          | 0.9978              | 0.6749                                           | 0.0054            | 0.6662                                         | 0.0241            | 0.6418                                         | 0.0033            | 0.6628                                         |
| TMA2GBM57 | 0.0342             | 0.5256                                          | 0.9682              | 0.5122                                           | 0.009             | 0.5137                                         | 0.0322            | 0.5228                                         | 0.0041            | 0.5327                                         |
| TMA2GBM58 | 0.1116             | 0.6485                                          | 0.6236              | 0.6299                                           | 0.0021            | 0.639                                          | 0.0019            | 0.6119                                         | 0.001             | 0.6167                                         |
| TMA2GBM58 | 0.1639             | 0.6452                                          | 0.9718              | 0.5949                                           | 0.0057            | 0.6213                                         | 0.007             | 0.5777                                         | 0.0023            | 0.6072                                         |
| TMA2GBM58 | 0.2095             | 0.6697                                          | 0.9921              | 0.6511                                           | 0.0045            | 0.6704                                         | 0.0036            | 0.5943                                         | 0.0017            | 0.6331                                         |
| TMA2GBM59 | 0.0223             | 0.5876                                          | 0.24                | 0.4805                                           | 0.0009            | 0.5371                                         | 0.002             | 0.5513                                         | 0                 | 0.5709                                         |
| TMA2GBM59 | 0.0354             | 0.5881                                          | 0.0238              | 0.4887                                           | 0.0002            | 0.5535                                         | 0.0048            | 0.5442                                         | 0.0008            | 0.5629                                         |
| TMA2GBM59 | 0.123              | 0.578                                           | 0.0139              | 0.4889                                           | 0.0007            | 0.556                                          | 0.0085            | 0.556                                          | 0                 | 0.5787                                         |
| TMA2GBM60 | 0.1591             | 0.7736                                          | 0.7222              | 0.671                                            | 0.0022            | 0.753                                          | 0.0011            | 0.7371                                         | 0.0032            | 0.7526                                         |
| TMA2GBM60 | 0.4869             | 0.7192                                          | 0.9963              | 0.6247                                           | 0.0039            | 0.6345                                         | 0.0134            | 0.5296                                         | 0.0018            | 0.6417                                         |
| TMA2GBM60 | 0.2403             | 0.6836                                          | 0.9991              | 0.6615                                           | 0.0009            | 0.6618                                         | 0.0272            | 0.6176                                         | 0.0003            | 0.6819                                         |
| TMA2GBM61 | 0.1353             | 0.7064                                          | 0.8703              | 0.6457                                           | 0.0055            | 0.6673                                         | 0.0031            | 0.6556                                         | 0.0016            | 0.6563                                         |
| TMA2GBM61 | 0.6393             | 0.7074                                          | 0.9961              | 0.686                                            | 0.0168            | 0.6843                                         | 0.0083            | 0.6696                                         | 0.0091            | 0.677                                          |
| TMA2GBM61 | 0.4818             | 0.71                                            | 0.9848              | 0.6684                                           | 0.0188            | 0.6924                                         | 0.0164            | 0.6794                                         | 0.0082            | 0.6956                                         |
| TMA2GBM62 | 0.1488             | 0.7264                                          | 0.6118              | 0.0495                                           | 0.004             | 0.6718                                         | 0                 | 0.6945                                         | 0.0012            | 0.7053                                         |
| TMA2GBM62 | 0.1899             | 0.7169                                          | 0.0807              | 0.3618                                           | 0.0236            | 0.6682                                         | 0.0018            | 0.6713                                         | 0.0099            | 0.6883                                         |
| TMA2GBM62 | 0.056              | 0.6369                                          | 0.8381              | 0.5689                                           | 0.0018            | 0.5891                                         | 0                 | 0.5797                                         | 0.0003            | 0.6058                                         |
| TMA2GBM63 | 0.1183             | 0.6952                                          | 0.2268              | 0.5909                                           | 0.0051            | 0.6589                                         | 0.0038            | 0.6568                                         | 0.0042            | 0.6612                                         |
| TMA2GBM63 | 0.0425             | 0.7267                                          | 0.066               | 0.501                                            | 0.0032            | 0.6795                                         | 0.0047            | 0.673                                          | 0.0016            | 0.6913                                         |
| TMA2GBM63 | 0.1346             | 0.5578                                          | 0.4451              | 0.4824                                           | 0.0281            | 0.3758                                         | 0.0521            | 0.3567                                         | 0.0247            | 0.3146                                         |
| TMA2GBM64 | 0.1365             | 0.6417                                          | 0.9992              | 0.5271                                           | 0.0007            | 0.558                                          | 0.0507            | 0.5292                                         | 0.0019            | 0.5993                                         |
| TMA2GBM64 | 0.0825             | 0.5788                                          | 0.9951              | 0.6156                                           | 0.0036            | 0.6414                                         | 0.0075            | 0.5159                                         | 0.0017            | 0.654                                          |
| TMA2GBM64 | 0.0301             | 0.7232                                          | 0.9658              | 0.6866                                           | 0.0014            | 0.6991                                         | 0.0027            | 0.682                                          | 0.0002            | 0.6975                                         |
| TMA2GBM65 | 0.4406             | 0.5844                                          | 0.9932              | 0.5536                                           | 0.0098            | 0.4614                                         | 0.0119            | 0.5011                                         | 0.0075            | 0.4391                                         |
| TMA2GBM65 | 0.0676             | 0.5661                                          | 0.3669              | 0.5332                                           | 0.0017            | 0.6109                                         | 0.0023            | 0.6124                                         | 0.0026            | 0.6345                                         |
| TMA2GBM65 | 0.0654             | 0.4953                                          | 0.6347              | 0.3781                                           | 0.0022            | 0.5013                                         | 0.0023            | 0.4965                                         | 0.0004            | 0.4874                                         |
| TMA2GBM66 | 0.2558             | 0.4997                                          | 0.9786              | 0.4779                                           | 0.029             | 0.3507                                         | 0.0287            | 0.4058                                         | 0.0164            | 0.3203                                         |
| TMA2GBM66 | 0.0158             | 0.7113                                          | 0.8363              | 0.6879                                           | 0.0072            | 0.6834                                         | 0.0043            | 0.6704                                         | 0.0017            | 0.6945                                         |
| TMA2GBM66 | 0.0096             | 0.6901                                          | 0.3542              | 0.642                                            | 0.0009            | 0.6541                                         | 0.001             | 0.6438                                         | 0.0005            | 0.6644                                         |
| TMA2GBM67 | 0.105              | 0.6386                                          | 0.4977              | 0.5339                                           | 0.0014            | 0.4371                                         | 0.007             | 0.5669                                         | 0.0022            | 0.53                                           |
| TMA2GBM67 | 0.0839             | 0.6446                                          | 0.8298              | 0.4733                                           | 0.0025            | 0.4326                                         | 0.0057            | 0.3565                                         | 0.0005            | 0.4996                                         |

**Supplementary Table S3: Results from Inform for each immune marker.**

| TMA ID    | CD68<br>Positivity | CD68<br>Tissue<br>Category<br>Area<br>(Tumor %) | CD163<br>Positivity | CD163<br>Tissue<br>Category<br>Area<br>(Tumor %) | CD3<br>Positivity | CD3<br>Tissue<br>Category<br>Area<br>(Tumor %) | CD4<br>Positivity | CD5<br>Tissue<br>Category<br>Area<br>(Tumor %) | CD8<br>Positivity | CD8<br>Tissue<br>Category<br>Area<br>(Tumor %) |
|-----------|--------------------|-------------------------------------------------|---------------------|--------------------------------------------------|-------------------|------------------------------------------------|-------------------|------------------------------------------------|-------------------|------------------------------------------------|
| TMA2GBM67 | 0.0865             | 0.6799                                          | 0.9891              | 0.6403                                           | 0.0116            | 0.6499                                         | 0.0063            | 0.6135                                         | 0.0055            | 0.5413                                         |
| TMA2GBM68 |                    |                                                 | 0.9566              | 0.1838                                           |                   |                                                | 0.023             | 0.0351                                         | 0.0936            | 0.3101                                         |
| TMA2GBM68 | 0.2642             | 0.6569                                          | 0.999               | 0.6218                                           | 0.0255            | 0.6508                                         | 0.0088            | 0.6115                                         | 0.0219            | 0.627                                          |
| TMA2GBM68 | 0.2214             | 0.7036                                          | 0.9966              | 0.6779                                           | 0.0104            | 0.6979                                         | 0.0029            | 0.6645                                         | 0.002             | 0.6812                                         |
| TMA2GBM69 | 0.0309             | 0.6434                                          | 0.3594              | 0.5799                                           | 0.0008            | 0.5926                                         | 0.0002            | 0.6014                                         | 0.0006            | 0.6128                                         |
| TMA2GBM69 | 0.0074             | 0.6536                                          | 0.2343              | 0.614                                            | 0.0006            | 0.601                                          | 0.0006            | 0.601                                          | 0.0002            | 0.6408                                         |
| TMA2GBM69 |                    |                                                 |                     |                                                  |                   |                                                |                   |                                                |                   |                                                |
| TMA2GBM70 | 0.0088             | 0.6955                                          | 0.01                | 0.4689                                           | 0.0007            | 0.6292                                         | 0.0008            | 0.6517                                         | 0.0004            | 0.6348                                         |
| TMA2GBM70 | 0.0679             | 0.7068                                          | 0.0446              | 0.5234                                           | 0.0018            | 0.6768                                         | 0.0017            | 0.6704                                         | 0.0016            | 0.6778                                         |
| TMA2GBM70 | 0.0076             | 0.6994                                          | 0.0108              | 0.4854                                           | 0.0002            | 0.6659                                         | 0.0004            | 0.6694                                         | 0                 | 0.6734                                         |
| TMA2GBM71 | 0.0808             | 0.6203                                          | 0.9911              | 0.5442                                           | 0.0519            | 0.5867                                         | 0.0155            | 0.5362                                         | 0.0188            | 0.513                                          |
| TMA2GBM71 | 0.0733             | 0.6936                                          | 0.7314              | 0.5893                                           | 0.0198            | 0.6827                                         | 0.0034            | 0.6522                                         | 0.0202            | 0.6601                                         |
| TMA2GBM71 | 0.138              | 0.6952                                          | 0.988               | 0.6405                                           | 0.0052            | 0.6599                                         | 0.0016            | 0.6507                                         | 0.0014            | 0.655                                          |
| TMA2GBM72 | 0.0413             | 0.6414                                          | 0.2786              | 0.4863                                           | 0.0011            | 0.634                                          | 0.0003            | 0.6316                                         | 0.0016            | 0.6313                                         |
| TMA2GBM72 | 0.1673             | 0.5898                                          | 0.0679              | 0.1695                                           | 0.0013            | 0.6854                                         | 0.0008            | 0.6923                                         | 0.0021            | 0.7015                                         |
| TMA2GBM72 | 0.0242             | 0.7547                                          | 0.1348              | 0.7053                                           | 0.004             | 0.7002                                         | 0.0045            | 0.6852                                         | 0.0008            | 0.7157                                         |
| TMA2GBM73 | 0.0999             | 0.6911                                          | 0.0307              | 0.2509                                           | 0.0007            | 0.6564                                         | 0.0007            | 0.652                                          | 0.0011            | 0.6613                                         |
| TMA2GBM73 | 0.0946             | 0.5608                                          | 0.0229              | 0.5729                                           | 0.0012            | 0.4542                                         | 0.0335            | 0.3465                                         | 0.0008            | 0.4201                                         |
| TMA2GBM73 | 0.3357             | 0.4118                                          | 0.0443              | 0.25                                             | 0.0085            | 0.4494                                         | 0.0031            | 0.4115                                         | 0.0067            | 0.4419                                         |
| TMA2GBM74 | 0.1075             | 0.5628                                          | 0.917               | 0.5221                                           | 0.0078            | 0.4916                                         | 0.0035            | 0.503                                          | 0.0026            | 0.4599                                         |
| TMA2GBM74 | 0.2257             | 0.5951                                          | 0.8099              | 0.5595                                           | 0.0074            | 0.5749                                         | 0.0027            | 0.5382                                         | 0.0024            | 0.5686                                         |
| TMA2GBM74 | 0.1578             | 0.5973                                          | 0.8612              | 0.3286                                           | 0.002             | 0.5645                                         | 0.0004            | 0.5354                                         | 0.0032            | 0.5882                                         |
| TMA2GBM75 | 0.3827             | 0.2399                                          | 0.9918              | 0.1789                                           | 0.012             | 0.1669                                         | 0.0449            | 0.1745                                         | 0.0032            | 0.1715                                         |
| TMA2GBM75 | 0.0998             | 0.6203                                          | 0.6184              | 0.5748                                           | 0.0017            | 0.567                                          | 0.0075            | 0.5572                                         | 0                 | 0.5834                                         |
| TMA2GBM75 | 0.2144             | 0.6263                                          | 0.9985              | 0.6159                                           | 0.0046            | 0.6504                                         | 0.0036            | 0.6114                                         | 0.0009            | 0.6476                                         |
| TMA2GBM76 | 0.1057             | 0.7375                                          | 0.1323              | 0.6672                                           | 0.0027            | 0.6866                                         | 0.0034            | 0.6828                                         | 0.0015            | 0.7083                                         |
| TMA2GBM76 | 0.0082             | 0.7074                                          | 0.1791              | 0.6734                                           | 0.0009            | 0.669                                          | 0.0026            | 0.6639                                         | 0.0003            | 0.6943                                         |
| TMA2GBM76 | 0.1896             | 0.6157                                          | 0.695               | 0.514                                            | 0.0002            | 0.6518                                         | 0.0009            | 0.6285                                         | 0                 | 0.6563                                         |
| TMA2GBM77 | 0.1034             | 0.6822                                          | 0.0194              | 0.425                                            | 0.0008            | 0.6539                                         | 0.0027            | 0.6284                                         | 0.0007            | 0.6578                                         |
| TMA2GBM77 | 0.1147             | 0.6637                                          | 0.0531              | 0.2543                                           | 0.0028            | 0.6399                                         | 0.0009            | 0.6265                                         | 0.0006            | 0.6424                                         |
| TMA2GBM77 | 0.0746             | 0.7199                                          | 0.0059              | 0.5872                                           | 0.0033            | 0.6853                                         | 0.0018            | 0.6843                                         | 0.0011            | 0.6883                                         |
| TMA2GBM78 | 0.0671             | 0.5602                                          | 0.2063              | 0.5093                                           | 0.0024            | 0.538                                          | 0.0002            | 0.5643                                         | 0.0023            | 0.5233                                         |
| TMA2GBM78 | 0.0461             | 0.673                                           | 0.2027              | 0.6771                                           | 0.001             | 0.6756                                         | 0.0002            | 0.6549                                         | 0.0019            | 0.6366                                         |
| TMA2GBM78 | 0.0608             | 0.5629                                          | 0.2713              | 0.5464                                           | 0.0004            | 0.5466                                         | 0                 | 0.5383                                         | 0.0005            | 0.5116                                         |
| TMA2GBM79 | 0.0802             | 0.6284                                          | 0.0785              | 0.4342                                           | 0.0028            | 0.6182                                         | 0.0013            | 0.5961                                         | 0.0022            | 0.5843                                         |
| TMA2GBM79 | 0.0886             | 0.6296                                          | 0.4905              | 0.6023                                           | 0.0031            | 0.6094                                         | 0.001             | 0.5598                                         | 0.0045            | 0.5798                                         |
| TMA2GBM79 | 0.0384             | 0.6019                                          | 0.2771              | 0.5447                                           | 0.0034            | 0.6168                                         | 0.0008            | 0.5881                                         | 0.003             | 0.5689                                         |

**Supplementary Table S3: Results from Inform for each immune marker.**

| TMA ID    | CD68<br>Positivity | CD68<br>Tissue<br>Category<br>Area<br>(Tumor %) | CD163<br>Positivity | CD163<br>Tissue<br>Category<br>Area<br>(Tumor %) | CD3<br>Positivity | CD3<br>Tissue<br>Category<br>Area<br>(Tumor %) | CD4<br>Positivity | CD5<br>Tissue<br>Category<br>Area<br>(Tumor %) | CD8<br>Positivity | CD8<br>Tissue<br>Category<br>Area<br>(Tumor %) |
|-----------|--------------------|-------------------------------------------------|---------------------|--------------------------------------------------|-------------------|------------------------------------------------|-------------------|------------------------------------------------|-------------------|------------------------------------------------|
| TMA2GBM80 | 0.2131             | 0.6368                                          | 0.0651              | 0.4895                                           | 0.0004            | 0.6552                                         | 0.0017            | 0.6529                                         | 0.0014            | 0.6031                                         |
| TMA2GBM80 | 0.0098             | 0.4666                                          | 0.1188              | 0.3139                                           | 0.0004            | 0.4109                                         | 0.0012            | 0.4329                                         | 0                 | 0.3692                                         |
| TMA2GBM80 | 0.006              | 0.6362                                          | 0.0966              | 0.1038                                           | 0.0002            | 0.6515                                         | 0                 | 0.6487                                         | 0                 | 0.5987                                         |
| TMA2GBM81 | 0.0482             | 0.3285                                          | 0.2639              | 0.6349                                           | 0                 | 0.5666                                         | 0                 | 0.6537                                         | 0.0018            | 0.4302                                         |
| TMA2GBM81 | 0.0748             | 0.6201                                          | 0.2106              | 0.6057                                           | 0.0011            | 0.5719                                         | 0.0023            | 0.5637                                         | 0.004             | 0.6018                                         |
| TMA2GBM81 | 0.0548             | 0.6461                                          | 0.3735              | 0.648                                            | 0.0015            | 0.6724                                         | 0.001             | 0.6738                                         | 0.0026            | 0.6249                                         |
| TMA2GBM82 | 0.0513             | 0.6712                                          | 0.9141              | 0.6701                                           | 0.0012            | 0.6787                                         | 0.0002            | 0.6654                                         | 0.0004            | 0.6495                                         |
| TMA2GBM82 | 0.0341             | 0.4871                                          | 0.9989              | 0.5911                                           | 0.0016            | 0.5388                                         | 0                 | 0.5783                                         | 0.0008            | 0.5212                                         |
| TMA2GBM82 | 0.0242             | 0.5907                                          | 0.9972              | 0.6464                                           | 0.0035            | 0.622                                          | 0.0024            | 0.6402                                         | 0.0031            | 0.6065                                         |
| TMA2GBM83 | 0.0334             | 0.721                                           | 0.0952              | 0.7349                                           | 0.0033            | 0.7319                                         | 0.0006            | 0.7089                                         | 0.0055            | 0.6932                                         |
| TMA2GBM83 | 0.1115             | 0.6154                                          | 0.0881              | 0.5063                                           | 0.0033            | 0.6368                                         | 0.0009            | 0.6285                                         | 0.007             | 0.5951                                         |
| TMA2GBM83 | 0.1358             | 0.6333                                          | 0.0321              | 0.4032                                           | 0.0028            | 0.642                                          | 0.0004            | 0.6298                                         | 0.0015            | 0.6016                                         |
| TMA2GBM84 | 0.0578             | 0.592                                           | 0.2359              | 0.595                                            | 0.0012            | 0.622                                          | 0.001             | 0.6121                                         | 0.0024            | 0.595                                          |
| TMA2GBM84 | 0.0761             | 0.6098                                          | 0.8237              | 0.6526                                           | 0.0018            | 0.6579                                         | 0.0012            | 0.6493                                         | 0.0011            | 0.6237                                         |
| TMA2GBM84 | 0.0569             | 0.6444                                          | 0.4412              | 0.6664                                           | 0.0002            | 0.6525                                         | 0.0002            | 0.6439                                         | 0.0011            | 0.623                                          |
| TMA2GBM85 | 0.0258             | 0.5681                                          | 0.0963              | 0.5668                                           | 0.0062            | 0.6343                                         | 0.0004            | 0.6211                                         | 0.0046            | 0.5951                                         |
| TMA2GBM85 | 0.0358             | 0.6032                                          | 0.1836              | 0.1986                                           | 0.003             | 0.626                                          | 0.0009            | 0.5919                                         |                   |                                                |
| TMA2GBM85 | 0.0203             | 0.4614                                          | 0.0641              | 0.4052                                           | 0.0062            | 0.4776                                         | 0.0019            | 0.4632                                         | 0.0068            | 0.4606                                         |
| TMA2GBM86 | 0.0286             | 0.5552                                          | 0.1498              | 0.5351                                           | 0.0009            | 0.5826                                         | 0.0027            | 0.5736                                         | 0.0003            | 0.5539                                         |
| TMA2GBM86 | 0.1924             | 0.4737                                          | 0.1546              | 0.3998                                           | 0.0179            | 0.4926                                         | 0.0083            | 0.4976                                         | 0.0098            | 0.4783                                         |
| TMA2GBM86 | 0.0421             | 0.5183                                          | 0.8077              | 0.5935                                           | 0.0088            | 0.5986                                         | 0.0381            | 0.5795                                         | 0.0015            | 0.5688                                         |
| TMA2GBM87 | 0.1014             | 0.6871                                          | 0.5949              | 0.6711                                           | 0.0004            | 0.6611                                         | 0.0003            | 0.6581                                         | 0.0142            | 0.635                                          |
| TMA2GBM87 | 0.1057             | 0.5909                                          | 0.9967              | 0.589                                            | 0.0196            | 0.5847                                         | 0.0038            | 0.5902                                         | 0.0203            | 0.5682                                         |
| TMA2GBM87 | 0.0434             | 0.2419                                          | 0.8385              | 0.2481                                           | 0.0188            | 0.2597                                         | 0.0133            | 0.2393                                         | 0.0158            | 0.2511                                         |
| TMA2GBM88 | 0.1177             | 0.6601                                          | 0.3871              | 0.6926                                           | 0.0048            | 0.6924                                         | 0.0017            | 0.7169                                         | 0.0006            | 0.6577                                         |
| TMA2GBM88 | 0.5302             | 0.4397                                          | 0.9838              | 0.4825                                           | 0.0027            | 0.5511                                         | 0.0039            | 0.5637                                         | 0.0124            | 0.4701                                         |
| TMA2GBM88 | 0.1338             | 0.4659                                          | 0.624               | 0.5747                                           | 0.0031            | 0.5715                                         | 0.0056            | 0.5639                                         | 0.0103            | 0.5458                                         |
| TMA2GBM89 | 0.1294             | 0.6271                                          | 0.6974              | 0.6187                                           | 0.003             | 0.6303                                         | 0.0009            | 0.6297                                         | 0.0045            | 0.5895                                         |
| TMA2GBM89 | 0.12               | 0.592                                           | 0.4541              | 0.618                                            | 0.0055            | 0.6314                                         | 0.0014            | 0.6316                                         | 0.0058            | 0.5859                                         |
| TMA2GBM89 | 0.1637             | 0.5194                                          | 0.9037              | 0.5893                                           | 0.0109            | 0.5917                                         | 0.0019            | 0.5872                                         | 0.0076            | 0.5656                                         |
| TMA2GBM90 | 0.4764             | 0.3471                                          | 0.9244              | 0.6026                                           | 0.0096            | 0.5932                                         | 0.0062            | 0.5632                                         | 0.0079            | 0.5588                                         |
| TMA2GBM90 | 0.5468             | 0.4319                                          | 0.8238              | 0.624                                            | 0.0244            | 0.561                                          | 0.0295            | 0.5998                                         | 0.0312            | 0.5701                                         |
| TMA2GBM90 | 0.298              | 0.4889                                          | 0.9103              | 0.6521                                           | 0.0204            | 0.6435                                         | 0.0028            | 0.6403                                         | 0.0206            | 0.6228                                         |
| TMA2GBM91 | 0.163              | 0.4227                                          | 0.9399              | 0.5387                                           | 0.0042            | 0.4975                                         | 0.0015            | 0.4959                                         | 0.0057            | 0.4225                                         |
| TMA2GBM91 | 0.1716             | 0.4541                                          | 0.3521              | 0.6107                                           | 0.0165            | 0.6239                                         | 0.002             | 0.6412                                         | 0.0089            | 0.5952                                         |
| TMA2GBM91 | 0.6905             | 0.5334                                          | 0.9991              | 0.6314                                           | 0.0031            | 0.646                                          | 0.0011            | 0.6366                                         | 0.0043            | 0.6222                                         |
| TMA2GBM92 | 0.0665             | 0.5405                                          | 0.9922              | 0.5616                                           | 0.0074            | 0.6287                                         | 0.0023            | 0.6167                                         | 0.0043            | 0.5841                                         |

**Supplementary Table S3: Results from Inform for each immune marker.**

| TMA ID    | CD68<br>Positivity | CD68<br>Tissue<br>Category<br>Area<br>(Tumor %) | CD163<br>Positivity | CD163<br>Tissue<br>Category<br>Area<br>(Tumor %) | CD3<br>Positivity | CD3<br>Tissue<br>Category<br>Area<br>(Tumor %) | CD4<br>Positivity | CD5<br>Tissue<br>Category<br>Area<br>(Tumor %) | CD8<br>Positivity | CD8<br>Tissue<br>Category<br>Area<br>(Tumor %) |
|-----------|--------------------|-------------------------------------------------|---------------------|--------------------------------------------------|-------------------|------------------------------------------------|-------------------|------------------------------------------------|-------------------|------------------------------------------------|
| TMA2GBM92 | 0.0357             | 0.621                                           | 0.3906              | 0.6336                                           | 0.0005            | 0.6382                                         | 0.0007            | 0.6432                                         | 0.0013            | 0.5995                                         |
| TMA2GBM92 | 0.1674             | 0.6681                                          | 0.9384              | 0.6632                                           | 0.0029            | 0.682                                          | 0.0011            | 0.678                                          | 0.0055            | 0.6331                                         |
| TMA2GBM93 | 0.1177             | 0.6797                                          | 0.028               | 0.0939                                           | 0                 | 0.6898                                         | 0.0005            | 0.7                                            | 0.0023            | 0.6778                                         |
| TMA2GBM93 | 0.0236             | 0.6387                                          | 0.0161              | 0.4431                                           | 0.0026            | 0.6712                                         | 0.0008            | 0.6776                                         | 0.0016            | 0.6518                                         |
| TMA2GBM93 | 0.1936             | 0.5688                                          | 0.0332              | 0.2329                                           | 0.0003            | 0.634                                          | 0.0006            | 0.6479                                         | 0.0022            | 0.6193                                         |
| TMA2GBM94 | 0.8081             | 0.483                                           | 0.944               | 0.1182                                           | 0.0166            | 0.0525                                         |                   |                                                | 0                 | 0.0249                                         |
| TMA2GBM94 | 0.4736             | 0.1526                                          | 0.9452              | 0.3641                                           | 0.0016            | 0.2862                                         | 0.0088            | 0.2658                                         | 0.0046            | 0.3266                                         |
| TMA2GBM94 | 0.1293             | 0.3788                                          | 0.9691              | 0.4347                                           | 0.0038            | 0.2907                                         | 0.0099            | 0.3636                                         | 0.0085            | 0.2475                                         |
| TMA2GBM95 | 0.3022             | 0.5137                                          | 0.1578              | 0.49                                             | 0.004             | 0.6378                                         | 0.0007            | 0.561                                          | 0.0043            | 0.6228                                         |
| TMA2GBM95 | 0.5003             | 0.6086                                          | 0.6306              | 0.6261                                           | 0.011             | 0.6666                                         | 0.0014            | 0.6564                                         | 0.0069            | 0.647                                          |
| TMA2GBM95 | 0.1942             | 0.6246                                          | 0.6336              | 0.6593                                           | 0.005             | 0.6577                                         | 0.0065            | 0.6519                                         | 0.0298            | 0.6265                                         |
| TMA2GBM96 | 0.1002             | 0.3225                                          | 0.5603              | 0.3118                                           | 0.0018            | 0.5842                                         | 0.0015            | 0.5351                                         | 0.0011            | 0.5653                                         |
| TMA2GBM96 | 0.2148             | 0.5183                                          | 0.9199              | 0.5278                                           | 0.003             | 0.6034                                         | 0                 | 0.6144                                         | 0.0021            | 0.5843                                         |
| TMA2GBM96 | 0.0414             | 0.6168                                          | 0.0941              | 0.2354                                           | 0.0031            | 0.6429                                         | 0.0007            | 0.6401                                         | 0.0014            | 0.6111                                         |
| TMA2GBM97 | 0.0628             | 0.57                                            | 0.8021              | 0.5888                                           | 0.0019            | 0.5844                                         | 0.0043            | 0.6015                                         | 0.002             | 0.5795                                         |
| TMA2GBM97 | 0.1018             | 0.6372                                          | 0.3617              | 0.6365                                           | 0.0096            | 0.6658                                         | 0.0025            | 0.6593                                         | 0.0103            | 0.6379                                         |
| TMA2GBM97 | 0.1244             | 0.5106                                          | 0.9045              | 0.6641                                           | 0.0006            | 0.6433                                         | 0.0101            | 0.6491                                         | 0.0045            | 0.6214                                         |
| TMA2GBM98 | 0.2053             | 0.6725                                          | 0.9977              | 0.7028                                           | 0.0144            | 0.7032                                         | 0.0027            | 0.708                                          | 0.0417            | 0.6658                                         |
| TMA2GBM98 | 0.0619             | 0.6757                                          | 0.5543              | 0.678                                            | 0.0041            | 0.7017                                         | 0.002             | 0.6951                                         | 0.0016            | 0.6507                                         |
| TMA2GBM98 | 0.1631             | 0.6156                                          | 0.9178              | 0.6584                                           | 0.0069            | 0.6517                                         | 0.0031            | 0.6451                                         | 0.0027            | 0.6155                                         |
